# Supplementary material for: Enteromorpha based porous carbons activated by zinc chloride for supercapacitors with high capacity retention
Source: Royal Society of Chemistry journal article supplement (doi:10.1039/c4ra13428a), 2015-01-01
Supplement: c4ra13428a1.pdf [file c4ra13428a1.pdf]

Supporting Information for

## Enteromorpha based porous carbons activated by zinc chloride for supercapacitors with high capacity retention

Mingbo Wu\*, Peng Li, Yang Li, Jun Liu, Yang Wang  
*State Key Laboratory of Heavy Oil Processing, China University of Petroleum,  
Qingdao 266580, China*

\*Corresponding author. Tel.: +86 532 8698 3452. E-mail address: wumb@upc.edu.cn

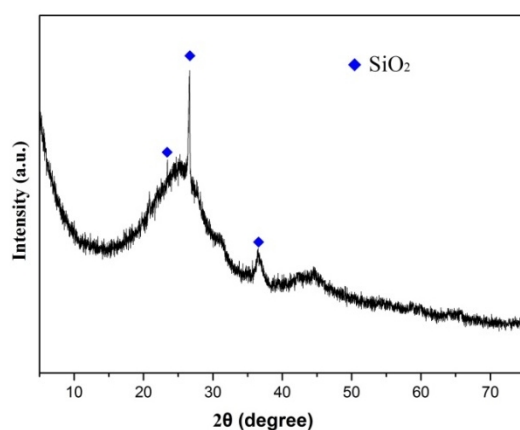

Fig. S1. XRD pattern of H700-0-1.5

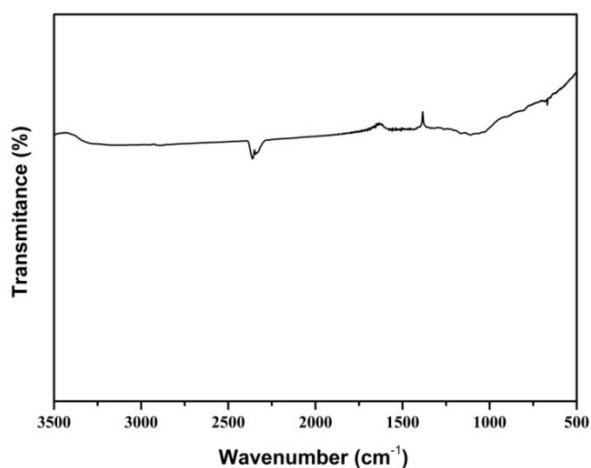

Fig. S2. FT-IR spectrum of H700-0-1.5

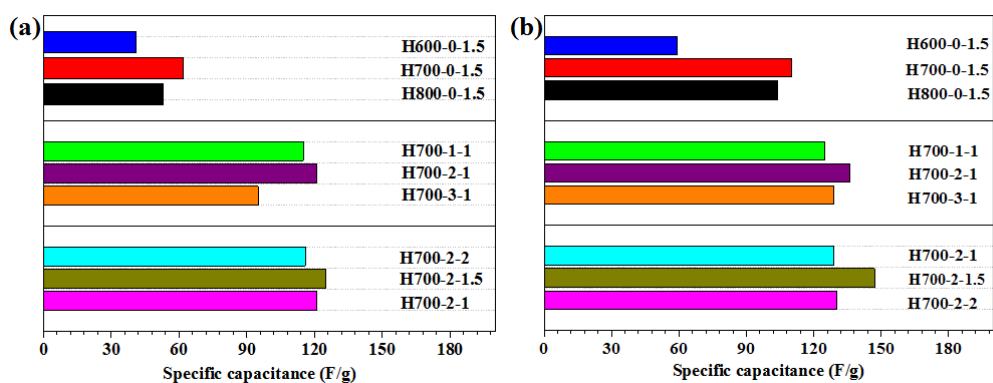

**Fig. S3.** Specific capacitance of EBPC under three electrodes at the current density of (a) 1 A/g and (b) 500 mA/g

The electrochemical performances of the resulting EBPCs have also been tested in three electrodes by Chronopotentiometry using CHI660E electrochemical workstation, and the corresponding electrode specific capacitances are shown in Fig. S3.

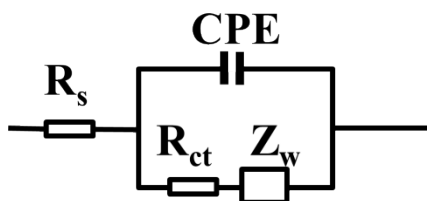

**Fig. S4.** Electrical equivalent circuit used for fitting the impedance spectra of H700-2-1.5 and H700-0-1.5
